# Supplementary material
Source: Research Square preprint supplement (doi:10.21203/rs.3.rs-9612481/v1)
Supplement: Supplementary file 1 [file 4b8048e4e7408f75b697b89d.xlsx]

## Sheet: Hoja1
					SECTION SEGRE 4
	Sample		1a	1b	2	3	4	5	6a	7	8a	9	10	11	12	13	14a	14b	14c	15	16	17	18	19	20	22	23	24	25b	25c	26	27	28	29	30	31	31T	32	33
	Weight (kg)		5.8	4.48	11.06	8.4	3.6	12.88	7.15	4.6	5.0	8.84	5.0	4.4	5.46	7.42	1.1	2.52	4.46	6.3	8.86	4.88	5.46	1.54	4.3	1.9	4.5	7.82	3.76	2.88	5.1	5.66	4.7	2.22	5.14	4.02	5.2	2.9	4.0
	Lanea omoalpha		1			1	2							1									1				5				1	9	4
	Lanea planilingua					1																									2
	Lanea eoeleanorae				1		2																								1	2	3
	Lanea telleri							5				6				1
	Ancyrodelloides transitans		6	2	1				1	1	4	6		4	3	1	1	1	4	18	9	10	9	6	9
	Ancyrodelloides trigonicus		4		11	5	1	2		2	1			1										1	2	1
	Ancyrodelloides asymmetricus		3	2	1			3	1			1?	2	1			1
	Ancyrodelloides kutscheri					1	1	4	3	2	1
	Ancyrodelloides murphyi								5	2	2
	Ancyrodelloides cruzae									1
	Kimognathus limbacarinatus																1	1			2
	Flajsella cf. schulzei																				1
	Flajsella stygia		1
	Flajsella cf. streptostygia																									1
	Masaraella pandora α																															10	1	1	7
	Masaraella pandora β																																1	2	3
	Icriodus angustoides alcoleae														1	2	1		1	20	9	11	8	8	35
	Pelekysgnathus guadarramensis																															3
	Pedavis breviramus																																		2
	Pedavis robertoi morphotype 1																																		1	1
	Pedavis pesavis																																			2
	Pedavis gilberti																																					1
	Pedavis robertoi morphotype 2																																						1
	Zieglerodina eladioi																										1
	Wurmiella wurmi		19		2																								2 cf.	2	3	5	7	5	2	10	4	2	9
	Pseudooneotodus beckmanni		3	1	1	1			1			1	1			1				2			2	1		3	3	12	20	3	4	108	2	5	56	3	1		3
	Panderodus unicostatus		1				3		6		1	1							1																1
	Dvorakia								1		1									1									1
		trigonicus-kutscheri Zone										lower					kutscheri-pandoraβ Zone									upper							pandora β-gilberti Zone					gilberti-
																																						steinachensis β Zone
